# Supplementary material for: Outcomes of SARS-CoV-2–Positive Youths Tested in Emergency Departments: The Global PERN–COVID-19 Study
Source: PubMed Central journal article supplement (PMC8753506; doi:10.1001/jamanetworkopen.2021.42322), 2022-01-11

## Supplemental Online Content

Funk AL, Florin TA, Kuppermann N, et al; Pediatric Emergency Research Network-COVID-19 Study Team. Outcomes of SARS-CoV-2–positive youths tested in emergency departments: the global PERN–COVID-19 study. *JAMA Netw Open*. 2022;5(1):e2142322. doi:10.1001/jamanetworkopen.2021.42322

**eTable 1.** Cumulative Outcomes, Up to 14 Days Following the Index ED Visit, Among 3221 SARS-CoV-2 Positive Children

**eTable 2.** Reasons for Return to Care Among 320 SARS-CoV-2 Positive Children Discharged on day 0 With Complete Follow-up

**eTable 3.** Cumulative Outcomes, Up to 14 Days Following the Index ED Visit, Among 2510 SARS-CoV-2 Positive Children Who Were Discharged to Home From the Index Emergency Department Visit

**eTable 4.** Association of Demographic Factors (Including Race and Ethnicity) and Medical History With Severe Outcomes Among the 2001 SARS-CoV-2 Positive Children From the United States With Complete Covariate Data

**eTable 5.** Comparison of Baseline Characteristics, SARS-CoV-2 Positive and SARS-CoV-2 Negative Participants Enrolled in the PERN-COVID-19 Cohort Study

**eTable 6.** Severe Outcomes in SARS-CoV-2 Negative and SARS-CoV-2 Positive Children, Stratified by Chronic Condition and Country of Enrollment

**eFigure.** Flow of SARS-CoV-2 Negative Study Participants Including Outcomes and Follow-up

This supplemental material has been provided by the authors to give readers additional information about their work.

**eTable 1: Cumulative outcomes, up to 14 days<sup>a</sup> following the index ED visit, among 3221<sup>b</sup> SARS-CoV-2 positive children. Data are n (%) [95%CI or one-sided 97.5%CI] unless otherwise stated.**

|                                                          | All children          | Sex                   |                       | Age group            |                      |                       |                       |                       | Chronic condition <sup>c</sup> |                       |
|----------------------------------------------------------|-----------------------|-----------------------|-----------------------|----------------------|----------------------|-----------------------|-----------------------|-----------------------|--------------------------------|-----------------------|
|                                                          |                       | Male                  | Female                | < 1 yr               | 1-<2 yr              | 2-<5 yr               | 5-<10 yr              | 10-<18 yr             | No                             | Yes                   |
|                                                          | N=3221                | N=1693                | N=1528                | N=828                | N=425                | N=576                 | N=551                 | N=842                 | N=2733                         | N=484                 |
| <b>Severe respiratory illness or ventilatory support</b> | 73 (2.3)<br>[1.8-2.8] | 39 (2.3)<br>[1.6-3.1] | 34 (2.2)<br>[1.5-3.1] | 9 (1.1)<br>[0.5-2.1] | 5 (1.2)<br>[0.4-2.7] | 13 (2.4)<br>[1.3-4.0] | 12 (2.1)<br>[1.1-3.6] | 34 (4.0)<br>[2.8-5.6] | 43 (1.6)<br>[1.1-2.1]          | 30 (6.2)<br>[4.2-8.7] |
| Acute respiratory distress syndrome                      | 20 (0.6)              | 12 (0.7)              | 8 (0.5)               | 5 (0.6)              | 1 (0.2)              | 5 (0.9)               | 2 (0.3)               | 7 (0.8)               | 13 (0.5)                       | 7 (1.4)               |
| Respiratory failure                                      | 40 (1.2)              | 23 (1.4)              | 17 (1.1)              | 5 (0.6)              | 4 (0.9)              | 6 (1.1)               | 7 (1.2)               | 18 (2.1)              | 21 (0.8)                       | 19 (3.9)              |
| Pleural effusion or pneumothorax <sup>e</sup>            | 6 (0.2)               | 4 (0.2)               | 2 (0.1)               | 0 (0)                | 0 (0)                | 0 (0)                 | 2 (0.3)               | 4 (0.5)               | 4 (0.1)                        | 2 (0.4)               |
| Positive pressure ventilation                            | 43 (1.3)              | 22 (1.3)              | 21 (1.4)              | 3 (0.4)              | 3 (0.7)              | 8 (1.5)               | 9 (1.6)               | 20 (2.4)              | 23 (0.8)                       | 20 (4.1)              |
| Chest drainage procedure                                 | 6 (0.2)               | 4 (0.2)               | 2 (0.1)               | 0 (0)                | 0 (0)                | 2 (0.4)               | 1 (0.2)               | 3 (0.4)               | 3 (0.1)                        | 3 (0.6)               |
| <b>Inotropic support</b>                                 | 34 (1.1)<br>[0.7-1.5] | 21 (1.2)<br>[0.8-1.9] | 13 (0.9)<br>[0.5-1.5] | 2 (0.2)<br>[0-0.9]   | 6 (1.4)<br>[0.5-3.0] | 2 (0.4)<br>[0-1.3]    | 9 (1.6)<br>[0.7-2.9]  | 15 (1.8)<br>[1.0-2.9] | 26 (1.0)<br>[0.6-1.4]          | 8 (1.7)<br>[0.7-3.2]  |
| <b>Cardiovascular illness</b>                            | 9 (0.3)<br>[0.1-0.5]  | 9 (0.5)<br>[0.2-1.0]  | 0 (0)<br>[0-0.2]      | 0 (0)<br>[0-0.4]     | 1 (0.2)<br>[0-1.3]   | 0 (0)<br>[0-0.7]      | 2 (0.3)<br>[0-1.2]    | 6 (0.7)<br>[0.3-1.5]  | 7 (0.3)<br>[0.1-0.5]           | 2 (0.4)<br>[0.1-1.5]  |
| Cardiac arrest                                           | 1 (0.03)              | 1 (0.06)              | 0 (0)                 | 0 (0)                | 1 (0.2)              | 0 (0)                 | 0 (0)                 | 0 (0)                 | 1 (0.04)                       | 0 (0)                 |
| Heart failure                                            | 2 (0.06)              | 2 (0.1)               | 0 (0)                 | 0 (0)                | 0 (0)                | 0 (0)                 | 0 (0)                 | 2 (0.2)               | 1 (0.04)                       | 1 (0.2)               |
| Stroke                                                   | 1 (0.03)              | 1 (0.06)              | 0 (0)                 | 0 (0)                | 0 (0)                | 0 (0)                 | 0 (0)                 | 1 (0.1)               | 1 (0.04)                       | 0 (0)                 |
| Myocarditis, endocarditis, pericarditis                  | 6 (0.2)               | 6 (0.4)               | 0 (0)                 | 0 (0)                | 0 (0)                | 0 (0)                 | 2 (0.3)               | 4 (0.5)               | 5 (0.2)                        | 1 (0.2)               |
| <b>Other severe illness, intervention</b>                | 22 (0.7)<br>[0.4-1.0] | 11 (0.6)<br>[0.3-1.2] | 11 (0.7)<br>[0.4-1.3] | 3 (0.4)<br>[0.1-1.1] | 2 (0.5)<br>[0.1-1.7] | 6 (1.1)<br>[0.4-2.4]  | 5 (0.9)<br>[0.3-2.0]  | 6 (0.7)<br>[0.3-1.5]  | 18 (0.7)<br>[0.4-1.0]          | 4 (0.8)<br>[0.2-2.1]  |
| Meningitis or encephalitis                               | 5 (0.2)               | 3 (0.2)               | 2 (0.1)               | 1 (0.1)              | 0 (0)                | 2 (0.4)               | 1 (0.2)               | 1 (0.1)               | 5 (0.2)                        | 0 (0)                 |

|                           |                       |                       |                       |                    |                      |                       |                       |                      |                       |                      |
|---------------------------|-----------------------|-----------------------|-----------------------|--------------------|----------------------|-----------------------|-----------------------|----------------------|-----------------------|----------------------|
| Septic shock              | 11 (0.3)              | 4 (0.2)               | 7 (0.5)               | 1 (0.1)            | 2 (0.5)              | 2 (0.3)               | 3 (0.5)               | 3 (0.4)              | 10 (0.4)              | 1 (0.2)              |
| Sepsis with bacteremia    | 2 (0.1)               | 1 (0.06)              | 1 (0.07)              | 0 (0)              | 1 (0.2)              | 1 (0.2)               | 0 (0)                 | 0 (0)                | 2 (0.1)               | 0 (0)                |
| Renal replacement therapy | 5 (0.2)               | 4 (0.2)               | 1 (0.07)              | 1 (0.1)            | 0 (0)                | 0 (0)                 | 2 (0.3)               | 2 (0.2)              | 2 (0.1)               | 3 (0.6)              |
| <b>Death</b>              | 4 (0.1)<br>[0.04-0.3] | 2 (0.1)<br>[0.02-0.5] | 2 (0.1)<br>[0.02-0.5] | 0 (0)<br>[0-0.6]   | 0 (0)<br>[0-1.1]     | 1 (0.2)<br>[0-1.1]    | 3 (0.5)<br>[0.1-1.7]  | 0 (0)<br>[0-0.6]     | 0 (0)<br>[0-0.2]      | 4 (0.8)<br>[0.3-2.3] |
| <b>MIS-C or Kawasaki</b>  | 50 (1.6)<br>[1.2-2.0] | 30 (1.8)<br>[1.2-2.5] | 20 (1.3)<br>[0.8-2.0] | 2 (0.2)<br>[0-0.9] | 4 (0.9)<br>[0.3-2.4] | 12 (2.2)<br>[1.1-3.8] | 23 (4.0)<br>[2.7-6.2] | 9 (1.1)<br>[0.5-2.0] | 45 (1.6)<br>[1.2-2.2] | 5 (1.0)<br>[0.3-2.4] |
| Severe outcome            | 16 (0.5)              | 11 (0.6)              | 5 (0.3)               | 0                  | 2 (0.5)              | 2 (0.3)               | 7 (1.3)               | 5 (0.6)              | 15 (0.5)              | 1 (0.2)              |

<sup>a</sup> May extend to 4 weeks for children hospitalized within 2 weeks, whose hospitalization extends past the 2-week follow-up time-point.

<sup>b</sup> No outcome information is known for the 1/3222 children without any emergency department discharge/hospitalization information

<sup>c</sup> Chronic condition is missing for 5/3221

<sup>d</sup> A child may have multiple diagnoses / interventions (categories are not mutually exclusive)

<sup>e</sup> requiring drainage

**eTable 2: Reasons for return to care among 320 SARS-CoV-2 positive children discharged on day 0 with complete follow-up.**

| Reason for return                                        | n (%)                 |
|----------------------------------------------------------|-----------------------|
| <b>Return to ED/hospital, reason unknown<sup>a</sup></b> | <b>151/320 (47.2)</b> |
| <b>Worsening or persistent symptoms general</b>          | <b>18/320 (5.6)</b>   |
| <b>Specific reason given for return<sup>b</sup></b>      | <b>151/320 (47.2)</b> |
| Fever                                                    | 47/151 (31.1)         |
| Cough                                                    | 42/151 (27.8)         |
| Other reason (presumed linked to COVID-19) <sup>c</sup>  | 28/151 (18.5)         |
| Difficulty breathing                                     | 25/151 (16.6)         |
| Rash (not specific to hands/feet)                        | 21/151 (13.9)         |
| Vomiting                                                 | 19/151 (12.6)         |
| Diarrhea                                                 | 10/151 (6.6)          |
| Abdominal pain                                           | 10/151 (6.6)          |
| Dehydration                                              | 6/151 (4.0)           |
| Rash on hands                                            | 6/151 (3.5)           |
| Rash on feet                                             | 2/151 (1.2)           |

<sup>a</sup>Question asked as 'return related to initial reason for ED visit or possible complications of illness?', 36/151 of these children were hospitalized.

<sup>b</sup>Children may have more than one reason noted.

<sup>c</sup>Symptom presumed by guardian/caregiver to be possibly linked to COVID-19.

**eTable 3: Cumulative outcomes, up to 14 days<sup>a</sup> following the index ED visit, among 2510<sup>b</sup> SARS-CoV-2 positive children who were discharged to home from the index emergency department visit. Data are n (%) [95%CI or one-sided 97.5% CI] unless otherwise stated.**

|                                                                                        | All children              | Sex                       |                           | Age group                 |                          |                         |                        |                          | Chronic condition <sup>c</sup> |                          |
|----------------------------------------------------------------------------------------|---------------------------|---------------------------|---------------------------|---------------------------|--------------------------|-------------------------|------------------------|--------------------------|--------------------------------|--------------------------|
|                                                                                        |                           | Male                      | Female                    | < 1 yr                    | 1-<2 yr                  | 2-<5 yr                 | 5-<10 yr               | 10-<18 yr                | No                             | Yes                      |
|                                                                                        | N=2510                    | N=1306                    | N=1204                    | N=647                     | N=362                    | N=432                   | N=449                  | N=620                    | N=2204                         | N=303                    |
| <b>Returned to care</b><br>(new symptoms, worsening condition, or persistent symptoms) | 320 (12.7)<br>[11.5-14.1] | 167 (12.8)<br>[11.0-14.7] | 153 (12.7)<br>[10.9-14.7] | 107 (16.5)<br>[13.8-19.6] | 49 (13.5)<br>[10.2-17.5] | 44 (10.2)<br>[7.5-13.4] | 37 (8.2)<br>[5.9-11.2] | 83 (13.4)<br>[10.8-16.3] | 270 (12.3)<br>[10.9-13.7]      | 50 (16.5)<br>[12.5-21.2] |
| <b>Hospitalized</b>                                                                    | 50 (2.0)<br>[1.5-2.6]     | 28 (2.1)<br>[1.4- 3.1]    | 22 (1.8)<br>[1.1-2.8]     | 16 (2.5)<br>[1.4-4.0]     | 9 (2.5)<br>[1.1-4.7]     | 8 (1.9)<br>[0.8-3.6]    | 4 (0.9)<br>[0.2-2.3]   | 13 (2.1)<br>[1.1-3.6]    | 36 (1.6)<br>[1.1-2.3]          | 14 (4.6)<br>[2.5- 7.6]   |
| Median stay in days<br>[IQR] <sup>d</sup>                                              | 3.0<br>(1.0, 5.2)         | 3.0 (1.0, 4.0)            | 3.0 (2.0, 9.0)            | 1.0 (0, 2.5)              | 3.5 (0.3, 5.5)           | 3.0 (1.0, 6.0)          | 5.0 (1.0, 11.0)        | 5.0 (3.0, 9.8)           | 3.0<br>(1.0, 4.0)              | 7.0 (2.0, 10.3)          |
| <b>ICU admission</b>                                                                   | 8 (0.3)<br>[0.2, 0.7]     | 1 (0.1)<br>[0-0.5]        | 7 (0.6)<br>[0.3-1.3]      | 0<br>[0-0.7]              | 0<br>[0-1.2]             | 1 (0.2)<br>[0.01-1.5]   | 1 (0.2)<br>[0.01-1.4]  | 6 (0.2)<br>[0.01-1.4]    | 4 (0.2)<br>[0.06-0.5]          | 4 (1.3)<br>[0.4, 3.6]    |
| Median stay in days<br>[IQR]                                                           | 6.0<br>(3.0, 11.0)        | 3.0<br>(NA)               | 7.0<br>(3.5, 11.0)        | NA                        | NA                       | 2.0<br>(NA)             | 11.0<br>(NA)           | 6.0<br>(3.5, 9.5)        | 3.4<br>(2.3, 7.0)              | 11.0<br>(6.0, 11.0)      |
| <b>Severe outcome<sup>e</sup></b>                                                      | 12 (0.5)<br>[0.2-0.8]     | 3 (0.2)<br>[0-0.7]        | 9 (0.7)<br>[0.3-1.4]      | 2 (0.3)<br>[0-1.1]        | 0<br>[0-1.0]             | 2 (0.5)<br>[0.1-1.7]    | 1 (0.2)<br>[0-1.2]     | 7 (1.1)<br>[0.5-2.3]     | 6 (0.3)<br>[0.1-0.6]           | 6 (2.0)<br>[0.7-4.3]     |
| Severe respiratory illness <sup>f</sup>                                                | 9 (0.4)                   | 2 (0.2)                   | 7 (0.6)                   | 2 (0.3)                   | 0                        | 1 (0.2)                 | 1 (0.2)                | 5 (0.8)                  | 4 (0.2)                        | 5 (1.7)                  |
| Inotropic support                                                                      | 1 (0.04)                  | 0                         | 1 (0.1)                   | 0                         | 0                        | 1 (0.2)                 | 0                      |                          | 1 (0.05)                       | 0                        |
| Myocarditis                                                                            | 1 (0.04)                  | 1 (0.1)                   | 0                         |                           |                          |                         |                        |                          |                                |                          |
| Sepsis with bacteremia                                                                 | 1 (0.04)                  | 0                         | 1 (0.1)                   | 0                         | 0                        | 1 (0.2)                 | 0                      | 0                        | 1 (0.05)                       | 0                        |
| Coagulation abnormality                                                                | 1 (0.04)                  | 0                         | 1 (0.1)                   | 0                         | 0                        | 0                       | 0                      | 1 (0.2)                  | 0                              | 1 (0.3)                  |

<sup>a</sup> May extend to 4 weeks for children hospitalized within 2 weeks, whose hospitalization extends past the 2 week follow-up time-point.

<sup>b</sup> Outcomes were censored (and not presented here) for 26/2536 children who were discharged at Day 0 but were lost-to-follow-up.

<sup>c</sup> Chronic condition information is missing for 3/2536.

<sup>d</sup> Missing length of stay for 8 hospitalized children.

<sup>e</sup> A child may have multiple diagnoses / interventions (categories are not mutually exclusive).

<sup>f</sup> Includes use of positive pressure ventilation or diagnosis of respiratory failure or diagnosis of acute respiratory distress syndrome .

**eTable 4: Association of demographic factors (including race and ethnicity) and medical history with severe outcomes among the 2001 SARS-CoV-2 positive children from the United States with complete covariate data. The following table reflects the final parsimonious model.**

|                                        | n/N     | Adjusted Odds Ratio | 95% Confidence Interval | P-value          |
|----------------------------------------|---------|---------------------|-------------------------|------------------|
| <b>Sex</b>                             |         |                     |                         |                  |
| Female                                 | 32/975  | ref                 |                         |                  |
| Male                                   | 49/1026 | <b>1.65</b>         | 0.96 – 2.83             | 0.07             |
| <b>Age category</b>                    |         |                     |                         |                  |
| < 1 year                               | 10/478  | ref                 |                         |                  |
| 1 – <2 years                           | 7/223   | <b>1.52</b>         | 0.69 – 3.35             | 0.30             |
| 2 - <5 years                           | 11/302  | <b>1.51</b>         | 0.72 – 3.19             | 0.28             |
| 5 - <10 years                          | 13/353  | <b>1.56</b>         | 0.99 – 2.45             | 0.06             |
| 10 - <18 years                         | 40/645  | <b>2.69</b>         | 1.32 – 5.47             | <b>0.006</b>     |
| <b>Ethnicity and race<sup>a</sup></b>  |         |                     |                         |                  |
| Hispanic                               | 30/789  | ref                 |                         |                  |
| Non-Hispanic Black                     | 30/736  | <b>1.00</b>         | 0.47 – 2.13             | >0.99            |
| Non-Hispanic White                     | 14/324  | <b>0.92</b>         | 0.50 – 1.69             | 0.79             |
| Non-Hispanic Other                     | 7/152   | <b>1.26</b>         | 0.38 – 4.20             | 0.71             |
| <b>Chronic condition<sup>b</sup></b>   |         |                     |                         |                  |
| No                                     | 53/1696 | ref                 |                         |                  |
| Yes                                    | 28/305  | <b>2.51</b>         | 1.56 – 4.06             | <b>&lt;0.001</b> |
| <b>Previous pneumonia<sup>b</sup></b>  |         |                     |                         |                  |
| No                                     | 62/1838 | ref                 |                         |                  |
| Yes                                    | 19/163  | <b>2.86</b>         | 1.57 – 5.19             | <b>0.001</b>     |
| <b>Asthma<sup>b</sup></b>              |         |                     |                         |                  |
| No                                     | 66/1670 | ref                 |                         |                  |
| Yes                                    | 15/331  | <b>0.60</b>         | 0.31 – 1.15             | 0.13             |
| <b>Symptom duration before testing</b> |         |                     |                         |                  |
| Asymptomatic                           |         | <b>1.35</b>         | 0.48 – 3.79             | 0.57             |
| 0-3 days                               | 25/886  | ref                 |                         |                  |
| 4-7 days                               | 30/484  | <b>2.41</b>         | 1.28 – 4.55             | <b>0.007</b>     |
| 8+ days                                | 8/144   | <b>1.79</b>         | 0.70 – 4.60             | 0.23             |
| Unknown                                | 18/487  | <b>1.21</b>         | 0.66 – 2.21             | 0.54             |
| <b>Date of SARS-CoV-2 infection</b>    |         |                     |                         |                  |
| Mar 7 – May 31, 2020                   | 14/195  | <b>1.72</b>         | 0.58 – 5.06             | 0.33             |
| Jun 1 – Aug 31, 2020                   | 22/538  | ref                 |                         |                  |
| Sept 1 – Nov 30, 2020                  | 20/474  | <b>0.80</b>         | 0.42 – 1.52             | 0.49             |
| Dec 1, 2020 – Feb 28, 2021             | 15/491  | <b>0.57</b>         | 0.29 – 1.16             | 0.12             |
| Mar 1 – June 15, 2021                  | 10/303  | <b>0.68</b>         | 0.30 – 1.54             | 0.36             |

<sup>a</sup> Race and ethnicity data were missing for 4 children from the United States.

<sup>b</sup> Chronic condition, previous pneumonia, and asthma data were missing for 2 children from the United States.

**eTable 5: Comparison of baseline characteristics, SARS-CoV-2 positive and SARS-CoV-2 negative participants enrolled in the PERN-COVID-19 cohort study.**

|                                          | SARS-CoV-2 positive<br>N=3222 | SARS-CoV-2 negative<br>N=7160 | P-value |
|------------------------------------------|-------------------------------|-------------------------------|---------|
| <b>Male</b>                              | 1694 (52.6)                   | 3833 (53.5)                   | 0.37    |
| <b>Age group</b>                         |                               |                               | <0.001  |
| <1 year                                  | 829 (25.7)                    | 1426 (20.1)                   |         |
| 1 - <2 year                              | 425 (13.2)                    | 1291 (18.0)                   |         |
| 2 - <5 years                             | 551 (17.1)                    | 1616 (22.6)                   |         |
| 5 - <10 years                            | 576 (17.9)                    | 1371 (19.1)                   |         |
| 10 - <18 years                           | 841 (26.1)                    | 1446 (20.2)                   |         |
| <b>Country</b>                           |                               |                               | <0.001  |
| Argentina                                | 28 (0.9)                      | 61 (0.9)                      |         |
| Australia                                | 0 (0)                         | 199 (2.8)                     |         |
| Canada                                   | 532 (16.5)                    | 2402 (33.5)                   |         |
| Costa Rica                               | 420 (13.0)                    | 516 (7.2)                     |         |
| Italy                                    | 18 (0.6)                      | 3 (0)                         |         |
| New Zealand                              | 0 (0)                         | 106 (1.5)                     |         |
| Paraguay                                 | 35 (1.1)                      | 21 (0.3)                      |         |
| Singapore                                | 30 (0.9)                      | 40 (0.6)                      |         |
| Spain                                    | 152 (4.7)                     | 259 (3.6)                     |         |
| United States                            | 2007 (62.3)                   | 3553 (49.6)                   |         |
| <b>Previous pneumonia<sup>a</sup></b>    | 227 (7.1)                     | 767 (10.7)                    | <0.001  |
| <b>Asthma<sup>b</sup></b>                | 423 (13.1)                    | 1011 (14.1)                   | 0.17    |
| <b>Chronic condition<sup>c,d</sup></b>   | 484 (15.0)                    | 1512 (21.2)                   | <0.001  |
| <b>Clinical presentation<sup>e</sup></b> |                               |                               |         |
| Asymptomatic                             | 172 (5.3)                     | 377 (5.3)                     | 0.89    |
| Symptomatic                              | 3048 (94.7)                   | 6768 (94.7)                   |         |
| <i>Fever</i>                             | 2125 (66.0)                   | 4289 (59.9)                   | <0.001  |
| <i>Respiratory<sup>f</sup></i>           | 2325 (72.2)                   | 4143 (57.9)                   | <0.001  |
| <i>Gastrointestinal<sup>g</sup></i>      | 1338 (43.1)                   | 3383 (47.2)                   | <0.001  |
| <i>Other<sup>h</sup></i>                 | 2176 (67.5)                   | 5343 (74.6)                   | <0.001  |
| <b>Date of infection</b>                 |                               |                               | <0.001  |
| Mar 7 – May 31, 2020                     | 235 (7.3)                     | 2079 (29.0)                   |         |
| Jun 1 – Aug 31, 2020                     | 851 (26.4)                    | 2749 (38.4)                   |         |
| Sept 1 – Nov 30, 2020                    | 769 (23.9)                    | 923 (12.9)                    |         |
| Dec 1, 2020 – Feb 28, 2021               | 734 (22.8)                    | 719 (10.0)                    |         |
| Mar 1 – June 15, 2021                    | 633 (19.7)                    | 690 (9.6)                     |         |

<sup>a</sup> Missing for 4 SARS-CoV-2 positive children, and 15 SARS-CoV-2 negative children.

<sup>b</sup> Missing for 4 SARS-CoV-2 positive children, and 15 SARS-CoV-2 negative children.

<sup>c</sup> Missing for 4 SARS-CoV-2 positive children, and 16 SARS-CoV-2 negative children.

<sup>d</sup> Children may have more than one specific chronic condition.

<sup>e</sup> Missing for 2 SARS-CoV-2 positive children, and 15 SARS-CoV-2 negative children.

<sup>f</sup> Includes cough, rhinorrhea/congestion, difficulty breathing, sore throat, chest pain, wheeze, sputum production, apnea.

<sup>g</sup> Includes vomiting, diarrhea, abdominal pain.

<sup>h</sup> Includes headache, seizure, loss of smell or taste, myalgia, arthralgia, drowsiness or lethargy, anorexia, oedema of extremities, irritability, conjunctivitis, skin rash, oral symptoms.



**eTable 6: Severe outcomes in SARS-CoV-2 negative and SARS-CoV-2 positive children, stratified by hospitalization status on day 0.**

|                     | All children      |                   |         | Hospitalized on Day 0 |                    |         | Discharged on Day 0 <sup>a</sup> |                  |         |
|---------------------|-------------------|-------------------|---------|-----------------------|--------------------|---------|----------------------------------|------------------|---------|
|                     | SARS-CoV-2 status |                   |         | SARS-CoV-2 status     |                    |         | SARS-CoV-2 status                |                  |         |
|                     | Positive          | Negative          | P-Value | Positive              | Negative           | P-Value | Positive                         | Negative         | P-Value |
| <b>All children</b> | 107/3221<br>(3.3) | 195/7156<br>(2.7) | 0.09    | 95/685<br>(13.9)      | 182/1820<br>(10.0) | 0.006   | 12/2510<br>(0.5)                 | 13/5336<br>(0.2) | 0.09    |
| <b>Country</b>      | 0/28 (0)          | 2/61 (3.3)        | >0.99   | 0/25 (0)              | 2/54 (3.7)         | >0.99   | 0/3                              | 0/7              | -       |
| Argentina           |                   |                   |         |                       |                    |         |                                  |                  |         |
| Australia           | -                 | 0/199             | -       | -                     | 0/70               | -       | -                                | 0/129            | -       |
| Canada              | 2/532 (0.4)       | 20/2402 (0.8)     | 0.41    | 1/33 (3.0)            | 15/171 (8.8)       | 0.48    | 1/498 (0.2)                      | 5/2227<br>(0.2)  | >0.99   |
| Costa Rica          | 19/420 (4.5)      | 13/516 (2.5)      | 0.09    | 19/127<br>(15.0)      | 13/118 (11.0)      | 0.36    | 0/293                            | 0/398            | -       |
| Italy               | 0/18 (0)          | 0/3 (0)           | -       | 0/12                  | 0/1                | -       | 0/6                              | 0/2              | -       |
| New Zealand         | -                 | 0/106             | -       | -                     | 0/14               | -       | -                                | 0/92             | -       |
| Paraguay            | 2/35 (5.7)        | 3/21 (14.3)       | 0.35    | 2/12 (16.7)           | 3/13 (23.1)        | >0.99   | 0/23                             | 0/8              | -       |
| Singapore           | 0/30 (0)          | 0/40 (0)          | -       | 0/30                  | 0/5                | -       | -                                | 0/35             | -       |
| Spain               | 3/152 (2.0)       | 6/259 (2.3)       | >0.99   | 3/45 (6.7)            | 6/131 (4.6)        | 0.70    | 0/107                            | 0/128            | -       |
| United States       | 81/2007 (4.0)     | 151/3553<br>(4.2) | 0.70    | 70/401<br>(17.5)      | 143/1243<br>(11.5) | 0.002   | 11/1606<br>(0.7)                 | 8/2310<br>(0.4)  | 0.16    |

<sup>a</sup>Excludes 26 and 31 SARS-CoV-2 positive and negative children, respectively, who were lost to follow-up).

<sup>b</sup>Chronic condition information missing for 4 SARS-CoV-2 positive children and 12 SARS-CoV-2 negative children.

eFigure. Flow of SARS-CoV-2 negative study participants including outcomes and follow-up.

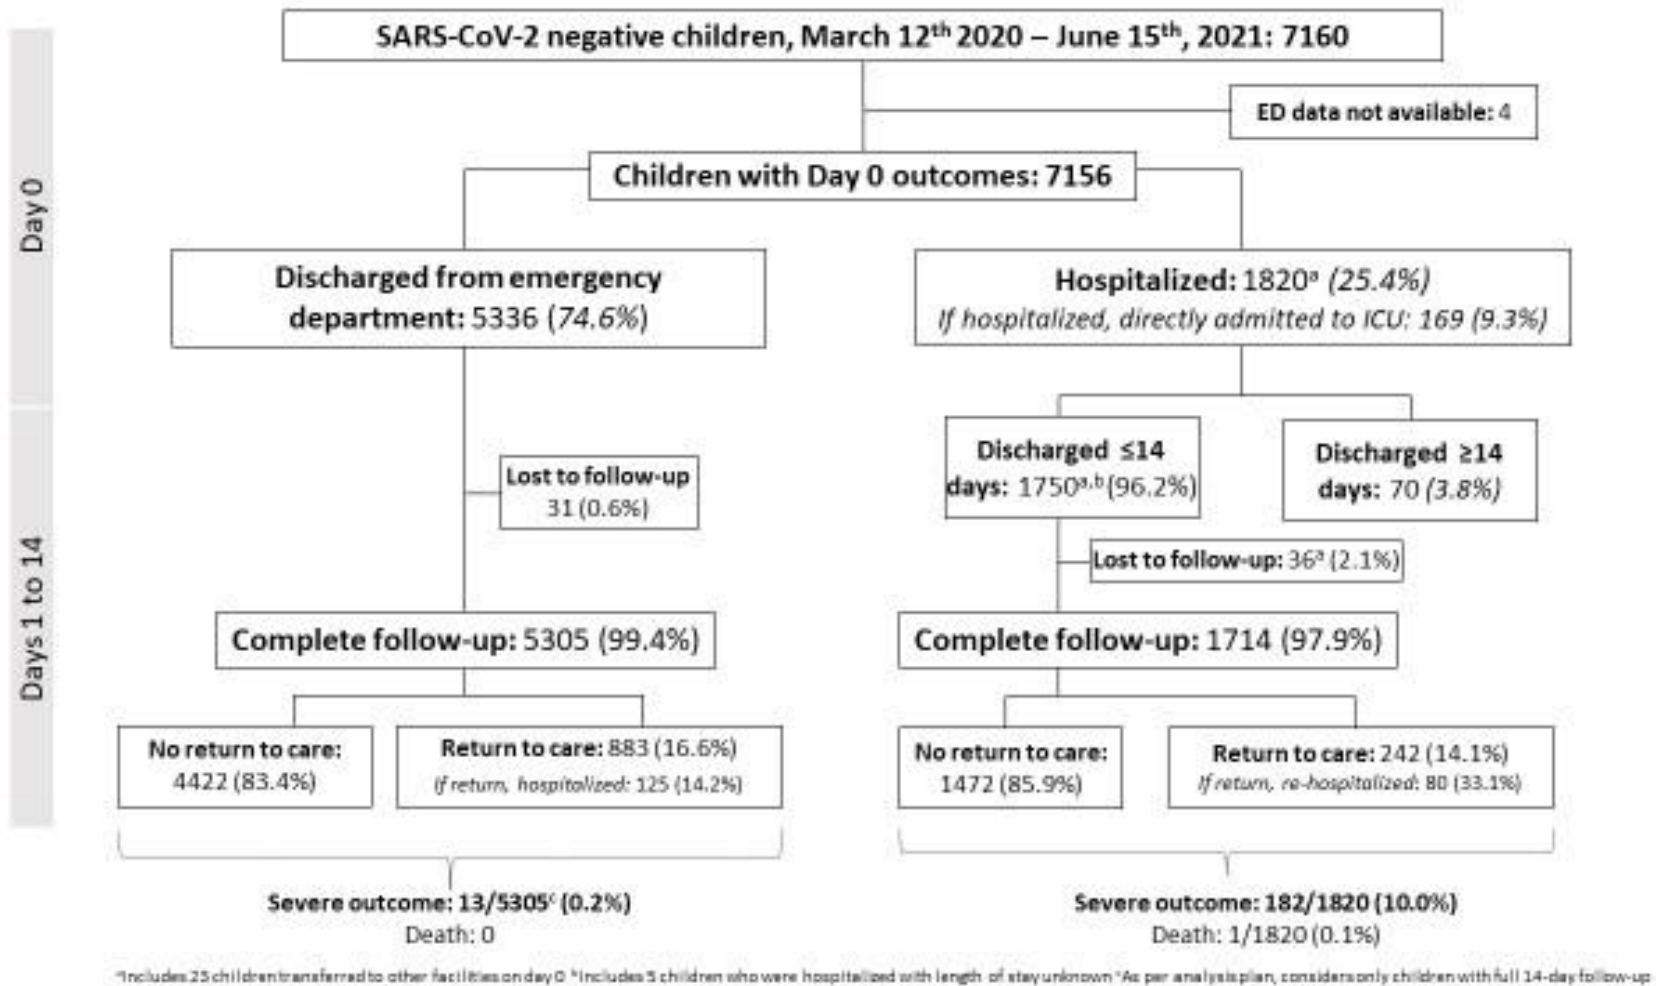

Supplement: jamanetwopen-e2142322-s001.pdf [file jamanetwopen-e2142322-s001.pdf]
