# Supplementary material for: Outcomes of SARS-CoV-2–Positive Youths Tested in Emergency Departments: The Global PERN–COVID-19 Study
Source: PubMed Central journal article supplement (PMC8753506; doi:10.1001/jamanetworkopen.2021.42322), 2022-01-11
Supplement: jamanetwopen-e2142322-s002.pdf [file jamanetwopen-e2142322-s002.pdf]

\*Indicates required information. Only first name, last name, and suffix will appear in PubMed.

| <b>*Group Name(s): Pediatric Emergency Research Network-COVID-19 Study Team</b> |                        |                              |                  |                                                     |                                          |                                                         |                                                                                            |
|---------------------------------------------------------------------------------|------------------------|------------------------------|------------------|-----------------------------------------------------|------------------------------------------|---------------------------------------------------------|--------------------------------------------------------------------------------------------|
| <b>*First Name and Middle Initial(s)</b>                                        | <b>*Last Name</b>      | <b>*Suffix (eg, Jr, III)</b> | Academic Degrees | Institution                                         | Location (city, state/province, country) | Role or Contribution, eg, chair, principal investigator | Group (if more than 1 Group listed in the byline) and/or Subgroup (eg, Steering Committee) |
| Jessica                                                                         | Gómez-Vargas           |                              |                  | Hospital Nacional de Niños Dr. Carlos Saenz Herrera | San José, Costa Rica                     | Site Investigator                                       |                                                                                            |
| Bethany                                                                         | Lerman                 |                              |                  | Hospital for Sick Children                          | Toronto, ON Canada                       | Research Coordinator                                    |                                                                                            |
| James                                                                           | Chamberlain            |                              |                  | Children's National Medical Center                  | Washington, DC, United States            | Site Investigator                                       |                                                                                            |
| Adebola                                                                         | Owolabi                |                              |                  | Children's National Medical Center                  | Washington, DC, United States            | Research Assistant                                      |                                                                                            |
| Camilla                                                                         | Schanche-Perret Gentil |                              |                  | Children's National Medical Center                  | Washington, DC, United States            | Research Coordinator                                    |                                                                                            |
| Sofie                                                                           | Ringold                |                              |                  | Children's Hospital Los Angeles                     | Los Angeles, CA, United States           | Research Coordinator                                    |                                                                                            |
| Jocy                                                                            | Perez                  |                              |                  | Children's Hospital Los Angeles                     | Los Angeles, CA, United States           | Research Assistant                                      |                                                                                            |
| Heidi                                                                           | Vander Velden          |                              |                  | Children's Minnesota                                | Minneapolis, MN, United States           | Research Coordinator                                    |                                                                                            |
| Tyrus                                                                           | Crawford               |                              |                  | Children's Hospital of Eastern Ontario              | Ottawa, ON, Canada                       | Research Coordinator                                    |                                                                                            |
| Steven E                                                                        | Schultz                |                              |                  | Palm Beach Children's Hospital                      | West Palm Beach, FL, United States       | Site Investigator                                       |                                                                                            |
| Kimberly                                                                        | Ross                   |                              |                  | Palm Beach Children's Hospital                      | West Palm Beach, FL, United States       | Research Coordinator                                    |                                                                                            |
| Kathy                                                                           | Monroe                 |                              |                  | Children's of Alabama                               | Birmingham, AL, United States            | Site Investigator                                       |                                                                                            |
| Karly                                                                           | Stillwell              |                              |                  | British Columbia Children's Hospital                | Vancouver, BC, Canada                    | Research Coordinator                                    |                                                                                            |
| Jillian                                                                         | Benedetti              |                              |                  | Lurie Children's Hospital                           | Chicago, IL, United States               | Research Coordinator                                    |                                                                                            |
| Sharon                                                                          | O'Brien                |                              |                  | Perth Children's Hospital                           | Perth, Australia                         | Research Coordinator                                    |                                                                                            |

## Supplemental Online Content: Nonauthor Collaborators

\*Indicates required information. Only first name, last name, and suffix will appear in PubMed.

| *First Name and Middle Initial(s) | *Last Name         | *Suffix (eg, Jr, III) | Academic Degrees | Institution                                   | Location (city, state/province, country) | Role or Contribution, eg, chair, principal investigator | Group (if more than 1 Group listed in the byline) and/or Subgroup (eg, Steering Committee) |
|-----------------------------------|--------------------|-----------------------|------------------|-----------------------------------------------|------------------------------------------|---------------------------------------------------------|--------------------------------------------------------------------------------------------|
| Kyle                              | Pimenta            |                       |                  | UC Davis Medical Center                       | Sacramento, CA, United States            | Research Coordinator                                    |                                                                                            |
| Amia                              | Andrade            |                       |                  | UC Davis Medical Center                       | Sacramento, CA, United States            | Research Coordinator                                    |                                                                                            |
| Adam                              | Isacoff            |                       |                  | Norton Children's Hospital                    | Louisville, KY, United States            | Site Investigator                                       |                                                                                            |
| Kendra                            | Sikes              |                       |                  | Norton Children's Hospital                    | Louisville, KY, United States            | Research Coordinator                                    |                                                                                            |
| Nina                              | Gold               |                       |                  | Sanzari Children's Hospital                   | Hackensack, NJ, United States            | Site Investigator                                       |                                                                                            |
| Kathleen                          | Reichard           |                       |                  | Sanzari Children's Hospital                   | Hackensack, NJ, United States            | Site Investigator                                       |                                                                                            |
| Maureen                           | Nemetski           |                       |                  | Sanzari Children's Hospital                   | Hackensack, NJ, United States            | Site Investigator                                       |                                                                                            |
| Pavani                            | Avva               |                       |                  | Sanzari Children's Hospital                   | Hackensack, NJ, United States            | Site Investigator                                       |                                                                                            |
| Rakesh                            | Mistry             |                       |                  | Children's Hospital of Colorado               | Aurora, CO, United States                | Site Investigator                                       |                                                                                            |
| Shanon                            | Young              |                       |                  | UPMC Children's Hospital of Pittsburgh        | Pittsburgh, PA, United States            | Research Coordinator                                    |                                                                                            |
| Marlena                           | Cook               |                       |                  | CHOP Children's Hospital of Philadelphia      | Philadelphia, PA, United States          | Research Coordinator                                    |                                                                                            |
| Virginia                          | Gómez Barrena      |                       |                  | Hospital Infantil Universitario Miguel Servet | Zaragoza, Spain                          | Site Investigator                                       |                                                                                            |
| Sandra                            | Castejón Ramírez   |                       |                  | Hospital Infantil Universitario Miguel Servet | Zaragoza, Spain                          | Site Investigator                                       |                                                                                            |
| María T                           | García Castellanos |                       |                  | Hospital Infantil Universitario Miguel Servet | Zaragoza, Spain                          | Site Investigator                                       |                                                                                            |
| Emma                              | Patterson          |                       |                  | Boston Children's Hospital                    | Boston, MA, United States                | Research Coordinator                                    |                                                                                            |
| Anicka                            | Samuel             |                       |                  | Boston Children's Hospital                    | Boston, MA, United States                | Research Coordinator                                    |                                                                                            |
| Redjana                           | Carciurmaru        |                       |                  | McMaster Children's Hospital                  | Hamilton, ON, Canada                     | Research Coordinator                                    |                                                                                            |
| Eleanor                           | Fitzpatrick        |                       |                  | IWK Health Center                             | Halifax, NS, Canada                      | Research Coordinator                                    |                                                                                            |

## Supplemental Online Content: Nonauthor Collaborators

\*Indicates required information. Only first name, last name, and suffix will appear in PubMed.

| *First Name and Middle Initial(s) | *Last Name     | *Suffix (eg, Jr, III) | Academic Degrees | Institution                                             | Location (city, state/province, country) | Role or Contribution, eg, chair, principal investigator | Group (if more than 1 Group listed in the byline) and/or Subgroup (eg, Steering Committee) |
|-----------------------------------|----------------|-----------------------|------------------|---------------------------------------------------------|------------------------------------------|---------------------------------------------------------|--------------------------------------------------------------------------------------------|
| Megan                             | Bonisch        |                       |                  | Starship Children's Hospital                            | Auckland, New Zealand                    | Research Coordinator                                    |                                                                                            |
| Bruce                             | Wright         |                       |                  | Stollery Children's Hospital                            | Edmonton, AB, Canada                     | Site Investigator                                       |                                                                                            |
| Mithra                            | Sivakumar      |                       |                  | Stollery Children's Hospital                            | Edmonton, AB, Canada                     | Research Coordinator                                    |                                                                                            |
| Patricia                          | Candelaria     |                       |                  | Stollery Children's Hospital                            | Edmonton, AB, Canada                     | Research Coordinator                                    |                                                                                            |
| Vincent                           | Cervantes      |                       |                  | University of Michigan                                  | Ann Arbor, MI, United States             | Research Coordinator                                    |                                                                                            |
| Shaminy                           | Manoranjithan  |                       |                  | Children's Healthcare of Atlanta-EMORY                  | Atlanta, GA, United States               | Research Coordinator                                    |                                                                                            |
| Nabeel                            | Khan           |                       |                  | Children's Healthcare of Atlanta-EMORY                  | Atlanta, GA, United States               | Research Coordinator                                    |                                                                                            |
| Toni                              | Harbour        |                       |                  | Primary Children's Hospital-Intermountain Healthcare    | Salt Lake City, UT,                      | Research Coordinator                                    |                                                                                            |
| Usha                              | Sethuraman     |                       |                  | Wayne State University (Childrens Hospital of Michigan) | Detroit, MI,                             | Site Investigator                                       |                                                                                            |
| Priya                             | Spencer        |                       |                  | Wayne State University (Childrens Hospital of Michigan) | Detroit, MI,                             | Research Coordinator                                    |                                                                                            |
| Neha                              | Gupta          |                       |                  | Wayne State University (Childrens Hospital of Michigan) | Detroit, MI,                             | Research Coordinator                                    |                                                                                            |
| Amira                             | Kamboj         |                       |                  | Wayne State University (Childrens Hospital of Michigan) | Detroit, MI,                             | Research Assistant                                      |                                                                                            |
| Gael                              | Muanamputu     |                       |                  | Wayne State University (Childrens Hospital of Michigan) | Detroit, MI,                             | Research Assistant                                      |                                                                                            |
| Guillermo                         | Kohn Loncarica |                       |                  | Hospital de Pediatría Prof. Dr. Juan P. Garrahan        | Buenos Aires, Argentina                  | Site Investigator                                       |                                                                                            |
| Eugenia                           | Hernández      |                       |                  | Hospital de Pediatría Prof. Dr. Juan P. Garrahan        | Buenos Aires, Argentina                  | Site Investigator                                       |                                                                                            |
| Ana                               | Dragovetzky    |                       |                  | Hospital de Pediatría Prof. Dr. Juan P. Garrahan        | Buenos Aires, Argentina                  | Site Investigator                                       |                                                                                            |
| Isabel                            | Beneyto Ferré  |                       |                  | Hospital Universitario Francesc de Borja                | Gandia, Spain                            | Site Investigator                                       |                                                                                            |
| Sylvia                            | Torres         |                       |                  | Children's Hospital of Wisconsin                        | Milwaukee, WI, United States             | Research Coordinator                                    |                                                                                            |
| Joseph                            | Zorc           |                       |                  | CHOP Children's Hospital of Philadelphia                | Philadelphia, PA, United States          | Site Investigator                                       |                                                                                            |
| Rebecca                           | Haber          |                       |                  | CHOP Children's Hospital of Philadelphia                | Philadelphia, PA, United States          | Research Coordinator                                    |                                                                                            |
| Ren Mee                           | Hiong          |                       |                  | KK Women's and Children's Hospital                      | Singapore                                | Research Coordinator                                    |                                                                                            |

## Supplemental Online Content: Nonauthor Collaborators

\*Indicates required information. Only first name, last name, and suffix will appear in PubMed.

| *First Name and Middle Initial(s) | *Last Name        | *Suffix (eg, Jr, III) | Academic Degrees | Institution                                                     | Location (city, state/province, country) | Role or Contribution, eg, chair, principal investigator | Group (if more than 1 Group listed in the byline) and/or Subgroup (eg, Steering Committee) |
|-----------------------------------|-------------------|-----------------------|------------------|-----------------------------------------------------------------|------------------------------------------|---------------------------------------------------------|--------------------------------------------------------------------------------------------|
| Dianna                            | Sri Dewi          |                       |                  | KK Women's and Children's Hospital                              | Singapore                                | Research Coordinator                                    |                                                                                            |
| Gary                              | Joubert           |                       |                  | London Health Sciences Centre                                   | London, ON, Canada                       | Site Investigator                                       |                                                                                            |
| Kamary                            | Coriolano Dasilva |                       |                  | London Health Sciences Centre                                   | London, ON,                              | Research Coordinator                                    |                                                                                            |
| Julie                             | Ochs              |                       |                  | Columbia - Morgan Stanley Childrens Hospital of NY-Presbyterian | New York City, NY, United States         | Research Coordinator                                    |                                                                                            |
| Alberto                           | Arrighini         |                       |                  | PRONTO SOCCORSO PEDIATRICO - A.S.S.T. Spedali Civili di Brescia | Brescia, Italy                           | Site Investigator                                       |                                                                                            |
| Camilla                           | Dallavilla        |                       |                  | PRONTO SOCCORSO PEDIATRICO - A.S.S.T. Spedali Civili di Brescia | Brescia, Italy                           | Site Investigator                                       |                                                                                            |
| Andrea                            | Kachelmeyer       |                       |                  | Cincinnati Children's Hospital Medical Center                   | Cincinnati, OH, Canada                   | Research Coordinator                                    |                                                                                            |
| Daisy                             | Marty Placencia   |                       |                  | Lincoln Medical Center                                          | New York City, NY, United States         | Site Investigator                                       |                                                                                            |
